# Supplementary material for: A non-cell-autonomous actin redistribution enables isotropic retinal growth
Source: PubMed Central journal article supplement (PMC6117063; doi:10.1371/journal.pbio.2006018), 2018-08-10
Supplement: pbio.2006018.s001.pdf [file pbio.2006018.s001.pdf]

S1 Table: Zebrafish transgenic lines and mutant used in this study.

|    | Line/mutant                   | Labeling/purpose                                                      | Reference      |
|----|-------------------------------|-----------------------------------------------------------------------|----------------|
| 1  | Wild-type WT-AB               | Control studies                                                       | RRID:ZIRC_ZL1  |
| 2  | Wild-type WT-TL               | Control studies                                                       | RRID:ZIRC_ZL86 |
| 3  | Tg(actb1:HRAS-EGFP)           | All membranes                                                         | [1]            |
| 4  | Tg( $\beta$ actin:mKate2-Ras) | All membranes                                                         | [2]            |
| 5  | Tg(actb1:GFP-UtrCH)           | F-actin                                                               | [3]            |
| 6  | Tg(hsp70:H2B-RFP)             | Chromatin                                                             | [4]            |
| 7  | Tg(ath5:GFP)                  | Membranes of RGCs and PRs                                             | [2]            |
| 8  | Tg(ath5:RFP)                  | Membranes of RGCs and PRs                                             | [2]            |
| 9  | Tg(SoFa2)                     | Differentiated retinal cells                                          | [5]            |
| 10 | hdac1 t24411                  | Inhibition of cell cycle exit and differentiation in zebrafish retina | [6]            |

## REFERENCES

1. Cooper MS, Szeto DP, Sommers-Herivel G, Topczewski J, Solnica-Krezel L, Kang H-C, et al. Visualizing morphogenesis in transgenic zebrafish embryos using BODIPY TR methyl ester dye as a vital counterstain for GFP. *Dev Dyn. Wiley Subscription Services, Inc., A Wiley Company*; 2005;232: 359–368. doi:10.1002/dvdy.20252
2. Icha J, Kunath C, Rocha-Martins M, Norden C. Independent modes of ganglion cell translocation ensure correct lamination of the zebrafish retina. *The Journal of Cell Biology. Rockefeller University Press*; 2016;215: 259–275. doi:10.1083/jcb.201604095
3. Behrndt M, Salbreux G, Campinho P, Hauschild R, Oswald F, Roensch J, et al. Forces driving epithelial spreading in zebrafish gastrulation. *Science*. 2012;338: 257–260. doi:10.1126/science.1224143
4. Dzafic E, Strzyz PJ, Wilsch-Bräuninger M, Norden C. Centriole Amplification in Zebrafish Affects Proliferation and Survival but Not Differentiation of Neural Progenitor Cells. *Cell Rep*. 2015;13: 168–182. doi:10.1016/j.celrep.2015.08.062
5. Almeida AD, Boije H, Chow RW, He J, Tham J, Suzuki SC, et al. Spectrum of Fates: a new approach to the study of the developing zebrafish retina. *Development*. 2014;141: 1971–1980. doi:10.1242/dev.104760
6. Stadler JA, Shkumatava A, Norton WHJ, Rau MJ, Geisler R, Fischer S, et al. Histone deacetylase 1 is required for cell cycle exit and differentiation in the zebrafish retina. *Dev Dyn. Wiley-Liss, Inc*; 2005;233: 883–889. doi:10.1002/dvdy.20427
