# Supplementary material for: A non-cell-autonomous actin redistribution enables isotropic retinal growth
Source: PubMed Central journal article supplement (PMC6117063; doi:10.1371/journal.pbio.2006018), 2018-08-10
Supplement: pbio.2006018.s002.pdf [file pbio.2006018.s002.pdf]

S2 Table: Morpholinos used in this study.

|   | Morpholino (MO) | Injected amount   | Sequence 5'-3'             | Reference |
|---|-----------------|-------------------|----------------------------|-----------|
| 1 | Hdac1           | 0.5 ng            | TTGTTCCCTTGAGAACTCAGCGCCAT | [1]       |
| 2 | P53             | 1-1.5x of main MO | GCGCCATTGCTTTGCAAGAATTG    | [2]       |

## REFERENCES

1. Yamaguchi M, Tonou-Fujimori N, Komori A, Maeda R, Nojima Y, Li H, et al. Histone deacetylase 1 regulates retinal neurogenesis in zebrafish by suppressing Wnt and Notch signaling pathways. *Development*. The Company of Biologists Ltd; 2005;132: 3027–3043. doi:10.1242/dev.01881
2. Robu ME, Larson JD, Nasevicius A, Beiraghi S, Brenner C, Farber SA, et al. p53 Activation by Knockdown Technologies. *PLOS Genet*. 2007;3: e78. doi:10.1371/journal.pgen.0030078
