# Supplementary material for: A non-cell-autonomous actin redistribution enables isotropic retinal growth
Source: PubMed Central journal article supplement (PMC6117063; doi:10.1371/journal.pbio.2006018), 2018-08-10
Supplement: pbio.2006018.s003.pdf [file pbio.2006018.s003.pdf]

S3 Table: Chemical inhibitors/drugs used in this study.

|   | Chemical             | Function             | Working dilution | Source/ Cat.No.         |
|---|----------------------|----------------------|------------------|-------------------------|
| 1 | Trichostatin A (TSA) | Hdac1 inhibition     | 0.8 mM           | Sigma-Aldrich; T1952    |
| 2 | Rockout              | Rho kinase inhibitor | 150-175 $\mu$ M  | Santa Cruz; sc-203237   |
| 3 | Hydroxyurea (HU)     | S-phase inhibitor    | 30 mM            | Sigma-Aldrich; H8627-1G |
| 4 | Aphidicolin (A)      | S-phase inhibitor    | 150 $\mu$ M      | Sigma-Aldrich; 89458    |
